# Supplementary material for: Estimation of reactive inorganic iodine fluxes in the Indian and Southern Ocean marine boundary layer
Source: Copernicus journal article supplement (doi:10.5194/acp-20-12093-2020), 2020-10-26
Supplement: Supplementary file 1 [file acp-20-12093-2020-supplement.pdf]

Supplement of Atmos. Chem. Phys., 20, 12093–12114, 2020  
<https://doi.org/10.5194/acp-20-12093-2020-supplement>  
© Author(s) 2020. This work is distributed under  
the Creative Commons Attribution 4.0 License.

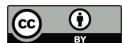

*Supplement of*

## **Estimation of reactive inorganic iodine fluxes in the Indian and Southern Ocean marine boundary layer**

**Swaleha Inamdar et al.**

*Correspondence to:* Anoop S. Mahajan (anoop@tropmet.res.in)

The copyright of individual parts of the supplement might differ from the CC BY 4.0 License.

23

## Supplementary Text

### 24 **1. Abbreviations used in the text:**

25 ISOE-8 8<sup>th</sup> Indian Southern Ocean Expedition

26 IIOE-2 2<sup>nd</sup> International Indian Ocean Expedition

27 ISOE-9 9<sup>th</sup> Indian Southern Ocean Expedition

28 SK-333 Sagar Kanya-333 expedition in the south Indian Ocean

29 BoBBLE Bay of Bengal Boundary Layer Experiments

30 Chl-*a* Chlorophyll-*a*

31 HYSPLIT HYbrid Single-Particle Lagrangian Integrated Trajectory (HYSPLIT) model  
32 (Rolph et al., 2017; Stein et al., 2015)

33 DSCD(s) Differential slant column density(ies)

### 34 **2. Multiple linear regression analysis**

35 A region-specific parameterisation tool for estimating sea surface iodide concentration was  
36 developed following the (Chance et al., 2014) method. Observations for SSI concentrations  
37 from ISOE-9, SK-333 and BoBBLE were used for the multiple linear regression analysis  
38 against various atmospheric and oceanic parameters. SST data used for linear regression  
39 analysis was recorded during ISOE-9 using a bucket thermometer at an interval of 6 hours  
40 accounting for a change of approximately 1 degree in the latitudinal track of the ship and  
41 simultaneously during each seawater iodide sampling. Seawater samples collected during  
42 ISOE-9 at the same interval as the recorded SST were used for salinity retrievals using the  
43 AUTOSAL salinometer. For the SK-333 and BoBBLE expeditions most of the samples were  
44 collected from the CTD casts and some (4 data points) were underway samples in case of

45 BoBBLE expedition. The MLD climatological monthly mean computed from climatological  
46 monthly mean profiles of potential temperature and potential density based on three different  
47 criteria was obtained using the World Ocean Atlas (Monterey and Levitus, 1997). That being;  
48 a temperature change from the ocean surface of 0.5 degree Celsius ( $MLD_{pt}$ ), a density change  
49 from the ocean surface of 0.125 (sigma units) ( $MLD_{pd}$ ), and a variable density change from  
50 the ocean surface corresponding to a temperature change of 0.5 degree Celsius ( $MLD_{vd}$ )  
51 (Monterey and Levitus, 1997). All three climatological monthly mean MLD data types  
52 ( $MLD_{pd}$ ,  $MLD_{pt}$ , and  $MLD_{vd}$ ) were used for linear regression with measured iodide  
53 concentration. The climatological monthly mean of sea surface nitrate concentrations for  
54 ISOE-9 was also obtained from the World Ocean Atlas 2013, version 2 (Garcia et al., 2013).  
55 Chl-*a* data for ISOE-9 was obtained from pigment analysis during ISOE-9.

### 56 **3. Dataset used for SSI estimation**

57 For estimating the SSI concentrations for all campaigns (ISOE-8, IIOE-2, and ISOE-9) using  
58 parameterisation methods in Eq. (1) to (5), the oceanic parameters were obtained from the  
59 observations during individual campaigns. Missing data was substituted with available data,  
60 as in the case of IIOE-2 campaign. For this campaign, salinity data was obtained from the  
61 World Ocean Atlas 2013, version 2 (Zweng et al., 2013). Also, chl-*a* data for IIOE-2 was  
62 obtained from level 3 daily and 8-day products of Aqua MODIS satellite (NASA-GSFC,  
63 2017). Similarly, sea surface nitrate concentrations and MLD for all the campaigns were  
64 obtained from World Ocean Atlas (Garcia et al., 2013; Monterey and Levitus, 1997).

### 65 **4. Parameterisation for SSI estimation**

66 Chance et al. (2014) developed two versions of empirical relationship for SSI estimation. The  
67 first one is given in the main text (Eq. 1). For the regional specific modification (Eq. 2 and 3),  
68 each of the oceanic parameters was obtained for the same location (SST, salinity, chl-*a*) as

69 the measured SSI concentrations from ISOE-9, SK-333 and BoBBLE. Likewise, monthly  
70 climatological datasets were obtained for MLD and nitrate with a one-degree spatial  
71 resolution, as described in the previous section. The regression analysis for region-specific  
72 modification was initially divided in three sections – first for the all the SSI observations  
73 including the Indian Ocean and the Southern Ocean (ISOE-9, SK-333, and BoBBLE). The  
74 second only for the Southern Ocean region (ISOE-9) and lastly only the Indian Ocean region  
75 (SK-333 and BoBBLE). A list of adjusted  $R^2$ , slope, intercept and significance of all  
76 parameters for linear regression with observed iodide concentration is provided in Table S1.  
77 The third scenario resulted insignificant coefficient of determination values ( $R^2$ ) for  
78 individual parameters. In this case, latitude and salinity were the only parameters that showed  
79 significant dependence on the observed SSI (Table S1). Individual parameters with  
80 significant  $R^2$  values were used to obtain a parametric equation for SSI concentration. The  
81 first, second, and third scenario resulting in parametrisation denoted by Eq. (2), Eq. (3), and  
82 Eq. (3a) respectively are given in the main text in Table 2. A combination similar to the  
83 Chance parameterisation given in Eq. (2) gave maximum  $R^2$  value of 0.794 ( $N = 128$ ) for the  
84 Indian Ocean and the Southern Ocean region. In this equation, all parameters are significant  
85 except for salinity and nitrate concentration. Removal of any one of these insignificant  
86 parameters did not make the other significant. The coefficient for this equation (Eq. 2) also  
87 remained insignificant with high error value ( $22 \pm 137$ ). The combination of  $SST^2$ , latitude,  
88 nitrate and salinity resulted in a maximum  $R^2 = 0.86$  ( $N=110$ ) for the dependent variable  
89 [iodide] in Eq. (3). The inclusion of  $MLD_{pt}$  (with highest  $R^2$  for MLD) increased the  $R^2$   
90 slightly but had a non-uniform distribution of the residuals and was thus excluded. Similarly,  
91 the addition of chl-*a* to the equation did not change the  $R^2$  significantly, and thus chl-*a* was  
92 removed from the final equation. The Indian Ocean scenario parameterisation in Eq. (3a)  
93 obtained  $R^2 = 0.325$  ( $N=18$ ). All parameters (latitude, salinity) and the coefficient were

94 insignificant with large error values as shown in Table 2. These equation datasets were tested  
95 for statistical robustness by ANOVA test using StatPlus analysis software. Both equation (2)  
96 and (3) dataset result in higher F ratio value corresponding to the critical F value from f-  
97 distribution table and p-value  $< 0.0001$  at 0.05 significance level. Eq. (2) obtains  $F = 94$  with  
98 (5, 122) degree of freedom (critical value = 2.289) and Eq. (3) obtains  $F = 161$  with (4,105)  
99 degree of freedom (critical value = 2.458). However, Eq. (3a) Indian Ocean dataset provides  
100 statistically insignificant result as the F value 3.604 with (2,15) degree of freedom is lower  
101 than the critical value of 3.682 with  $p = 0.053$ . Thus, this parameterisation is omitted from  
102 further analysis in the study and is indicative that the sea surface iodide estimation in the  
103 Indian Ocean does not follow the Chance parameterisation technique. It is important to note  
104 that this analysis involved a small dataset ( $N=18$ ) and more observational studies will be  
105 required to estimate iodide concentrations in this region. SSI concentration was also  
106 estimated using the logarithmic parameterisation by Chance et al. (2014) and it was found to  
107 be higher in comparison to the measured SSI concentration from ISOE-9. The  $\ln[\text{iodide}]$   
108 equation estimated SSI concentrations of  $\sim 500$  nM in the Indian Ocean region which is very  
109 high compared to global observations of SSI in the Indian Ocean (Chance et al., 2014,  
110 Chance et al., 2019) and in comparison to the observations from SK-333 and BoBBLE for the  
111 South Indian Ocean. Therefore, we excluded the logarithmic parametrization for this study  
112 and suggest that the  $\ln[\text{iodide}]$  parametrization is not adequate for SSI estimation.

## 113 **5. References**

114 Chance, R., Baker, A. R., Carpenter, L. and Jickells, T. D.: The distribution of iodide at the  
115 sea surface, *Environ. Sci. Process. Impacts*, 16(8), 1841–1859, doi:10.1039/C4EM00139G,  
116 2014.

117 Garcia, H. E., Locarnini, R. A., Boyer, T. P., Antonov, J. I., Baranova, O. K., Zweng, M. M.,

118 Reagan, J. R. and Johnson, D. R.: WORLD OCEAN ATLAS 2013 Volume 4: Dissolved  
119 Inorganic Nutrients (phosphate, nitrate, silicate), NOAA Atlas NESDIS 76., 2013.

120 Monterey, G. and Levitus, S.: Seasonal Variability of Mixed Layer Depth for the World  
121 Ocean. [online] Available from: <http://www.nodc.noaa.gov>, 1997.

122 NASA-GSFC: Ocean Color Web. [online] Available from: <https://oceancolor.gsfc.nasa.gov/>,  
123 2017.

124 Rolph, G., Stein, A. and Stunder, B.: Real-time Environmental Applications and Display  
125 sYstem: READY, Environ. Model. Softw., 95, 210–228, doi:10.1016/j.envsoft.2017.06.025,  
126 2017.

127 Stein, A. F., Draxler, R. R., Rolph, G. D., Stunder, B. J. B., Cohen, M. D. and Ngan, F.:  
128 Noaa’s hysplit atmospheric transport and dispersion modeling system, Bull. Am. Meteorol.  
129 Soc., 96(12), 2059–2077, doi:10.1175/BAMS-D-14-00110.1, 2015.

130 Zweng, M. M., Reagan, J. R., Antonov, J. I., Locarnini, R. A., Mishonov, A. V., Boyer, T. P.,  
131 Garcia, H. E., Baranova, O. K., Johnson, D. R., Seidov, D. and Biddle, M. M.: WORLD  
132 OCEAN ATLAS 2013 Volume 2: Salinity. [online] Available from:  
133 <http://www.nodc.noaa.gov/OC5/indprod.html>, 2013.

134 **6. Figures**

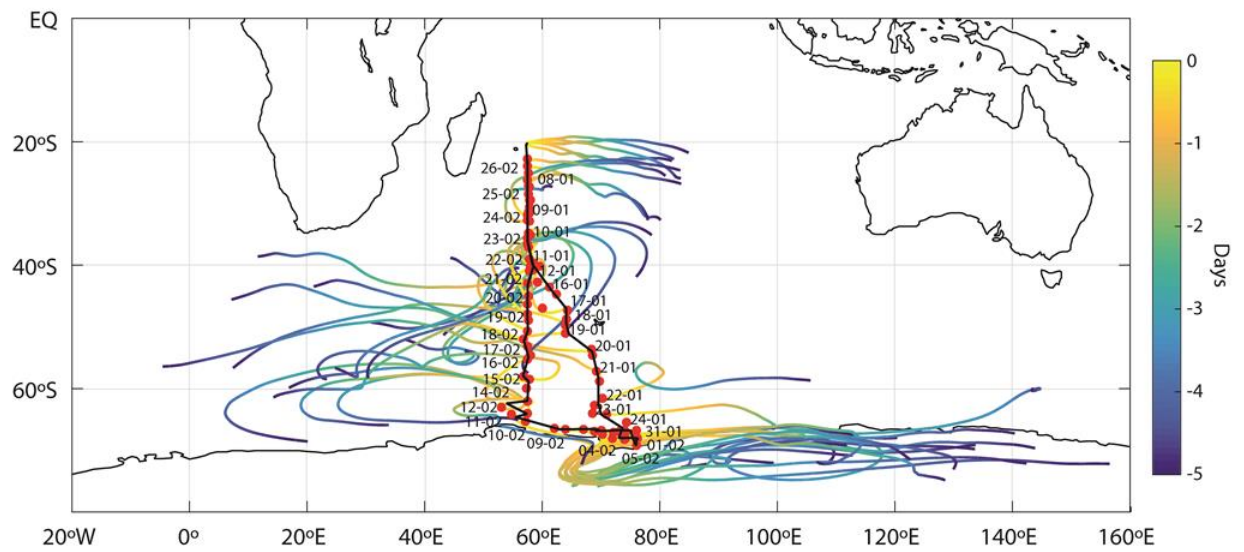

135

136 **Figure S1: Map of the south Indian Ocean and the Southern Ocean showing the cruise**  
 137 **track (black line) for the ISOE-9 campaign. Along the cruise track 5-days backward**  
 138 **wind trajectories (HYSPLIT) of the air masses arriving the locations at noon each day**  
 139 **of the ISOE-9 expedition. Sea surface iodide sampling locations marked in red circles**  
 140 **along with the date of sampling.**

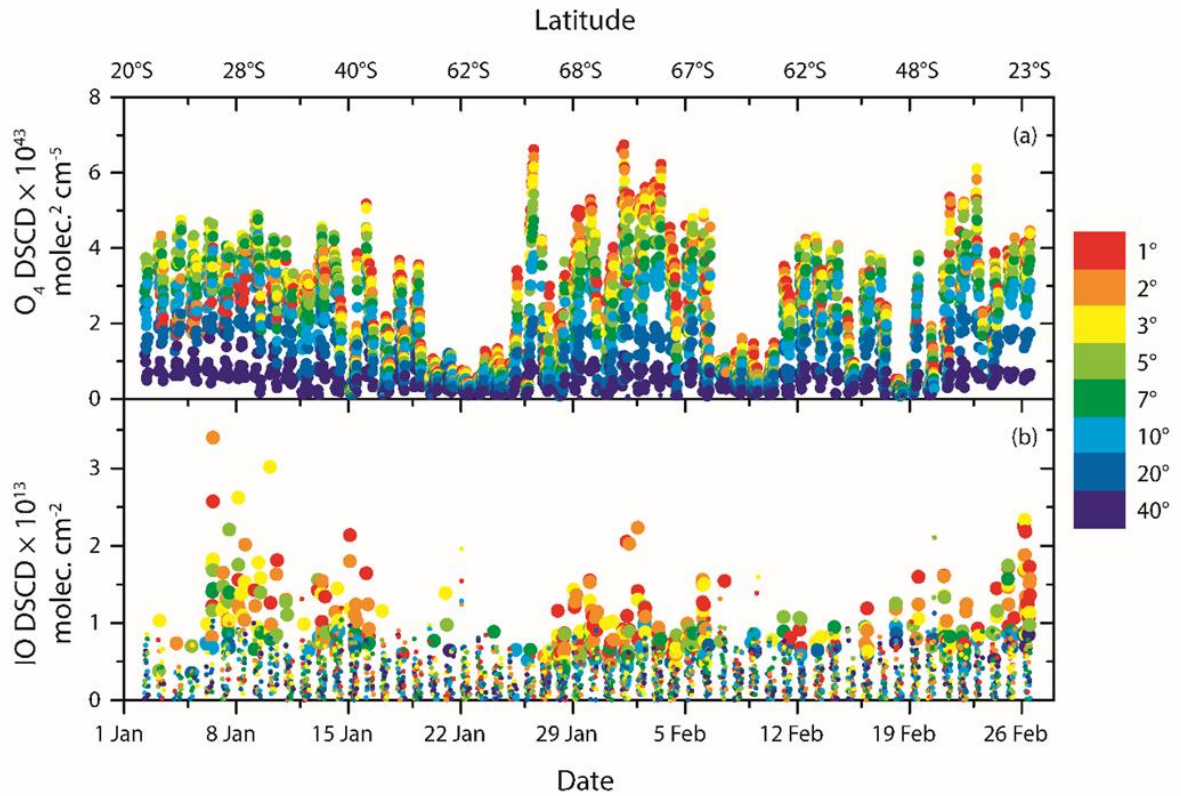

141

142 **Figure S2: Timeline of the O<sub>4</sub> and IO DSCDs observed during the ISOE-9 expedition.**

143 **The top scale indicates corresponding latitudes for the dates, and colour code represents**

144 **the elevation angle (°) for each scan. Smaller circles indicate DSCDs below  $\sigma$  detection**

145 **limit for IO and  $2\sigma$  in case of O<sub>4</sub>; bigger circles indicate DSCDs above the detection**

146 **limit respectively.**



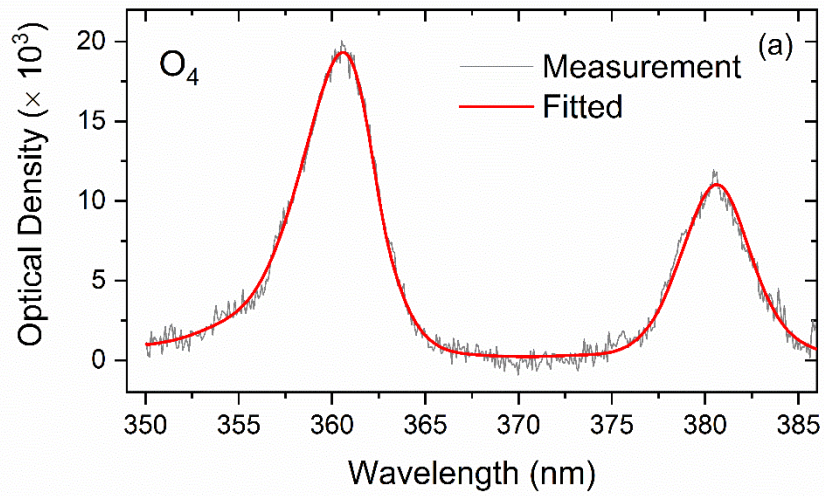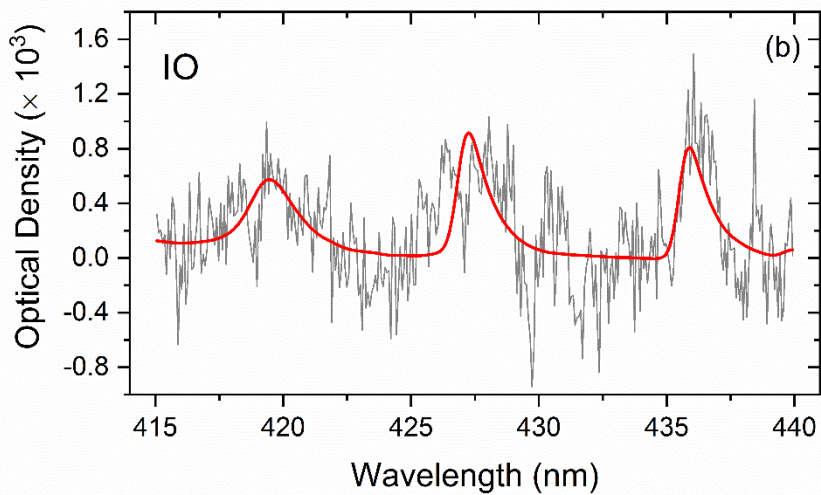

147

148 **Figure S3: An example of typical spectral fit for O<sub>4</sub> (a) and IO (b) during the ISOE-9**  
 149 **expedition. These spectral fits were taken on 26 February 2017 at 15:35 (local time), for**  
 150 **solar zenith angle 69.5° and 1° elevation angle. These fits retrieved O<sub>4</sub> slant column**  
 151 **density of  $(4.35 \pm 0.035) \times 10^{43}$  molecules cm<sup>-2</sup> and  $(2.24 \pm 0.36) \times 10^{13}$  molecules cm<sup>-2</sup> with**  
 152 **residual optical density (root mean square) of  $3.2 \times 10^{-4}$  and  $5.5 \times 10^{-4}$  respectively.**

153

154

| Parameter                 | R <sup>2</sup> | Slope (m)          | Intercept (C)    | p < 5%? (p)                     |
|---------------------------|----------------|--------------------|------------------|---------------------------------|
| SST                       | 0.64           | 4.26 ± 0.29        | 31 ± 4.77        | Yes (0)                         |
|                           | 0.62           | 4.03 ± 0.304       | 32.2 ± 4.17      | Yes (0)                         |
|                           | 0.07           | 28.8 ± 26.22       | -668.85 ± 754.52 | No (0.29)                       |
| 1/SST (K <sup>-1</sup> )  | 0.62           | -345781 ± 23910    | 1297 ± 83.9      | Yes (0)                         |
|                           | 0.59           | -322918 ± 25302    | 1215 ± 89.5      | Yes (0)                         |
|                           | 0.07           | -2616459 ± 2392959 | 8826 ± 7926      | No (0.29)                       |
| SST <sup>2</sup>          | 0.73           | 0.16 ± 0.0085      | 41.1 ± 3.6       | Yes (0)                         |
|                           | 0.79           | 0.18 ± 0.01        | 39.2 ± 2.7       | Yes (0)                         |
|                           | 0.07           | 0.51 ± 0.45        | -261.9 ± 375.2   | No (0.28)                       |
| NO <sub>3</sub>           | 0.42           | -3.24 ± 0.34       | 125 ± 5.7        | Yes (0)                         |
|                           | 0.39           | -2.63 ± 0.32       | 110.6 ± 5.8      | Yes (3.06 × 10 <sup>-13</sup> ) |
|                           | 0.03           | 19.34 ± 27         | 153 ± 17         | No (0.48)                       |
| Latitude                  | 0.55           | -2.1 ± 0.17        | 178.3 ± 8.3      | Yes (0)                         |
|                           | 0.52           | -2.43 ± 0.22       | 196.1 ± 11.7     | Yes (0)                         |
|                           | 0.30           | 8.74 ± 3.35        | 108.5 ± 23.11    | Yes (0.02)                      |
| Monthly MLD <sub>pt</sub> | 0.17           | -1.1 ± 0.22        | 125 ± 9.2        | Yes (1.2 × 10 <sup>-6</sup> )   |
|                           | 0.08           | -0.63 ± 0.21       | 97.6 ± 9.4       | Yes (0.003)                     |
|                           | 0.14           | -2.69 ± 1.68       | 203.41 ± 30.38   | No (0.13)                       |
| Monthly MLD <sub>vd</sub> | 0.04           | -0.48 ± 0.2        | 98 ± 8           | Yes (0.03)                      |
|                           | 0.003          | -0.11 ± 0.19       | 75.9 ± 7.5       | No (0.56)                       |
|                           | 0.16           | -2.69 ± 1.55       | 193.52 ± 23.6    | No (0.10)                       |
| Monthly MLD <sub>pd</sub> | 0.12           | -0.67 ± 0.16       | 110 ± 7.8        | Yes (5.2 × 10 <sup>-5</sup> )   |
|                           | 0.05           | -0.35 ± 0.15       | 87.1 ± 7.7       | Yes (0.02)                      |
|                           | 0.15           | -2.51 ± 1.52       | 194.8 ± 25       | No (0.12)                       |
| Salinity                  | 0.08           | 16 ± 4.8           | -468 ± 165       | Yes (0.001)                     |
|                           | 0.23           | 21.8 ± 3.8         | -675 ± 130       | Yes (8 × 10 <sup>-8</sup> )     |
|                           | 0.30           | -42.41 ± 16.21     | 1609.3 ± 551     | Yes (0.02)                      |

|                           |              |                               |                              |                  |
|---------------------------|--------------|-------------------------------|------------------------------|------------------|
| <b>Chlorophyll<br/>-a</b> | 0.025        | $-37 \pm 26$                  | $84 \pm 8.6$                 | No (0.16)        |
|                           | <i>0.002</i> | <i><math>-7 \pm 20</math></i> | <i><math>62 \pm 7</math></i> | <i>No (0.73)</i> |
|                           | 0.01         | $77.83 \pm 206$               | $136 \pm 31$                 | No (0.71)        |

156

157 **Table S1: Linear regression analysis results for each parameter against field**  
158 **observations of sea surface iodide for paramterisation Eq. (2) in standard font and Eq.**  
159 **(3) in italics, and grey shaded rows for Eq. (3a). R<sup>2</sup> represents the coefficient of**  
160 **determination (COD); the last column is a check for statistical significance at 5% with**  
161 **the p-value in parenthesis.**
